# Supplementary material
Source: publisher site journal article supplement (https://www.dovepress.com/article/609048)
Supplement: Supplementary file 1 [file 609048_Supplementary%20Appendix%20S1%20%25E2%2580%2593%20Rule-Based%20Decision%20Tree%20and%20Chatbot%20Knowledge%20Base_1.pdf]

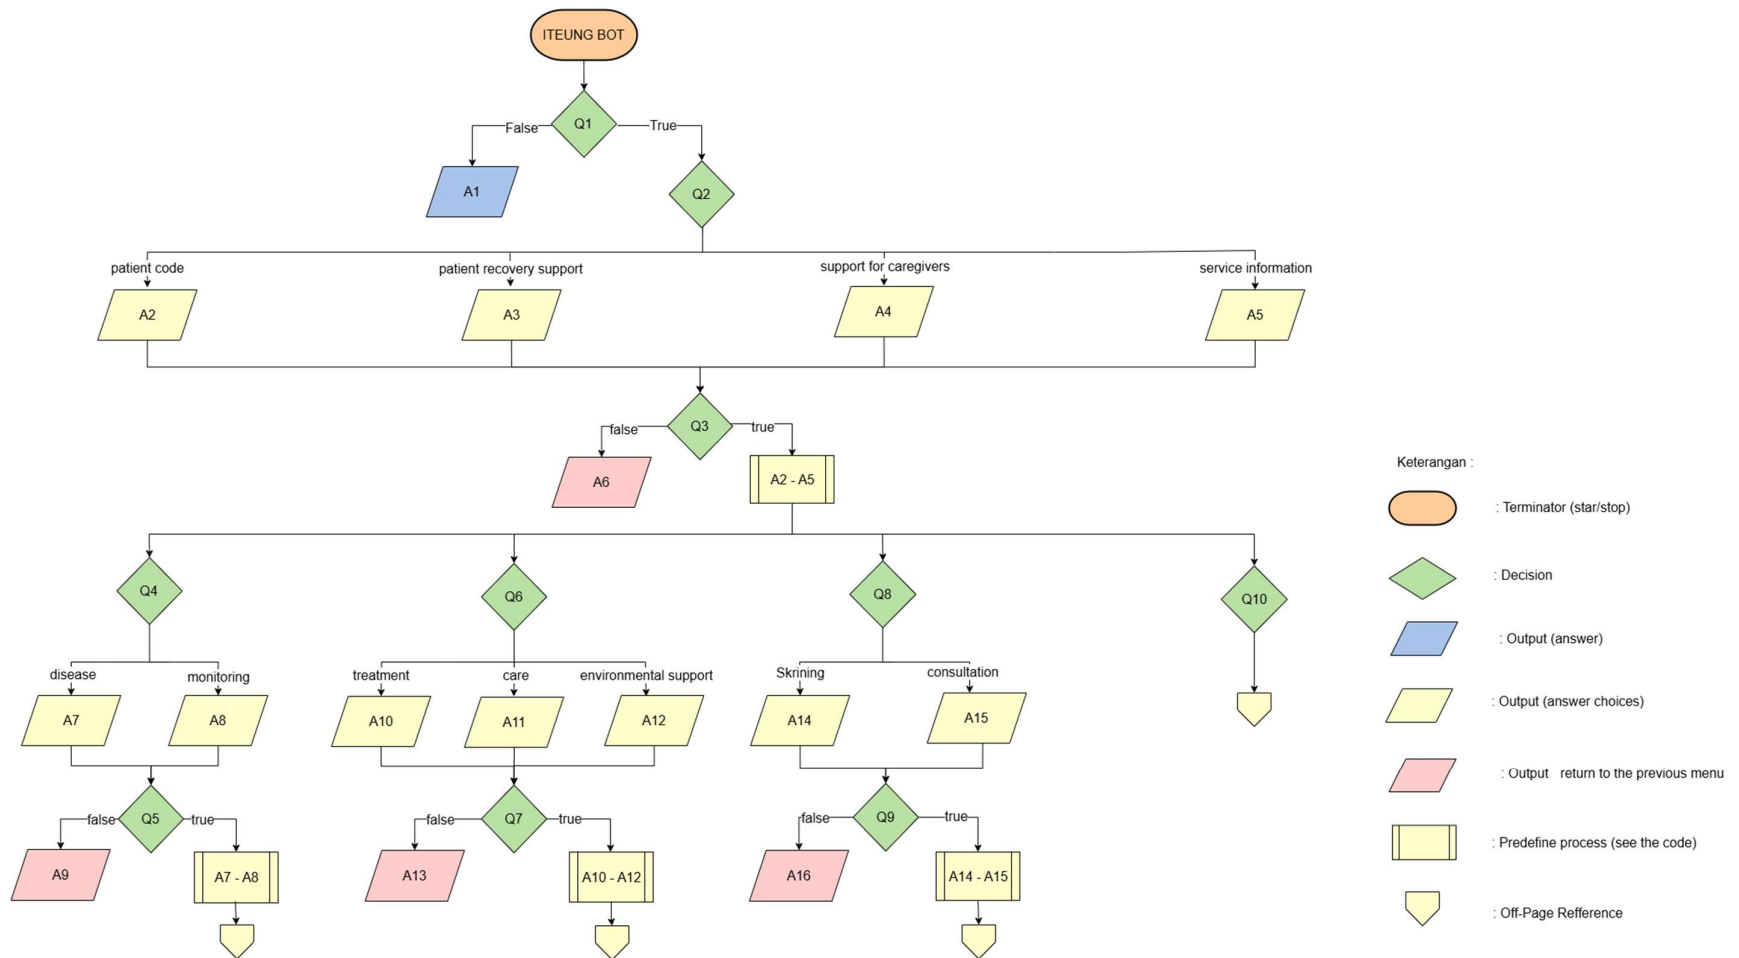

Figure S1. Data Flow Diagram Decision Tree Chatbot - Home page

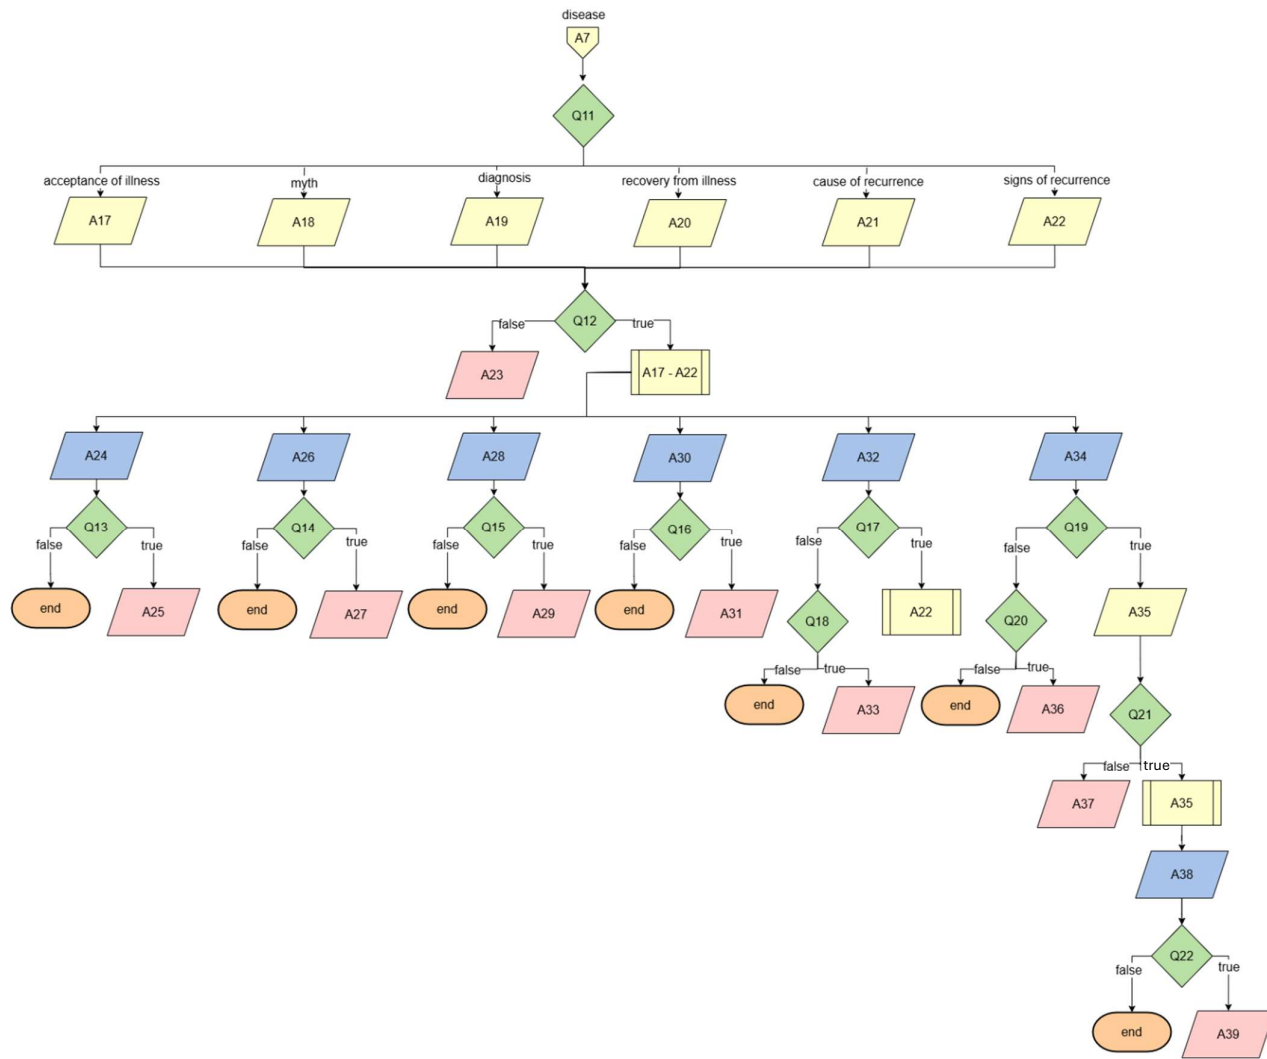

Figure S2. Data Flow Diagram Decision Tree Chatbot - Disease

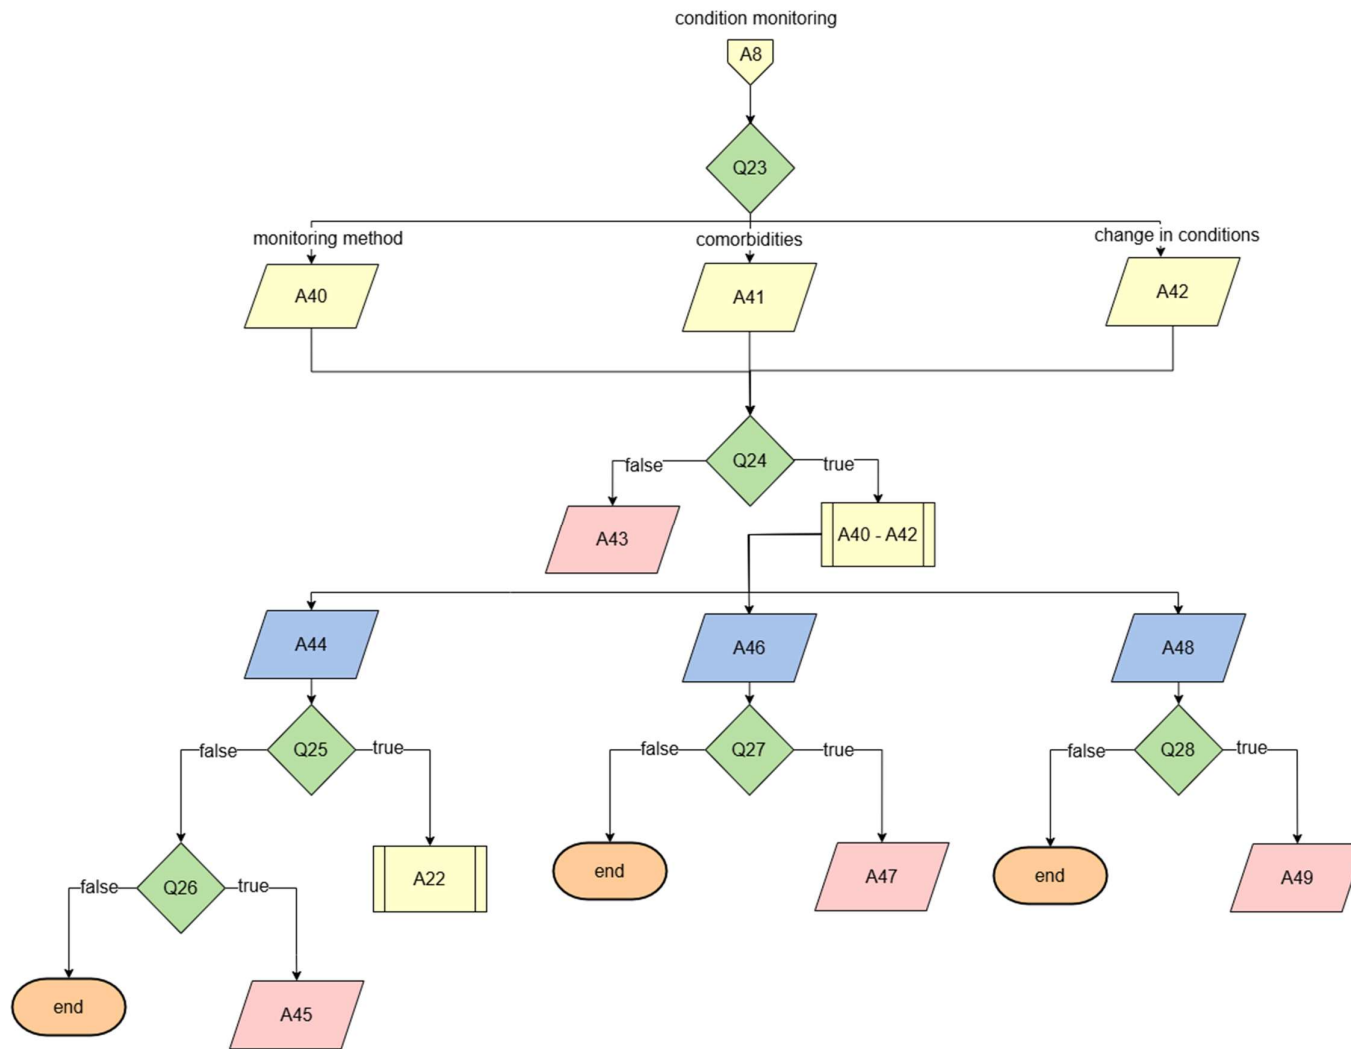

Figure S3. Data Flow Diagram Decision Tree Chatbot – Condition monitoring

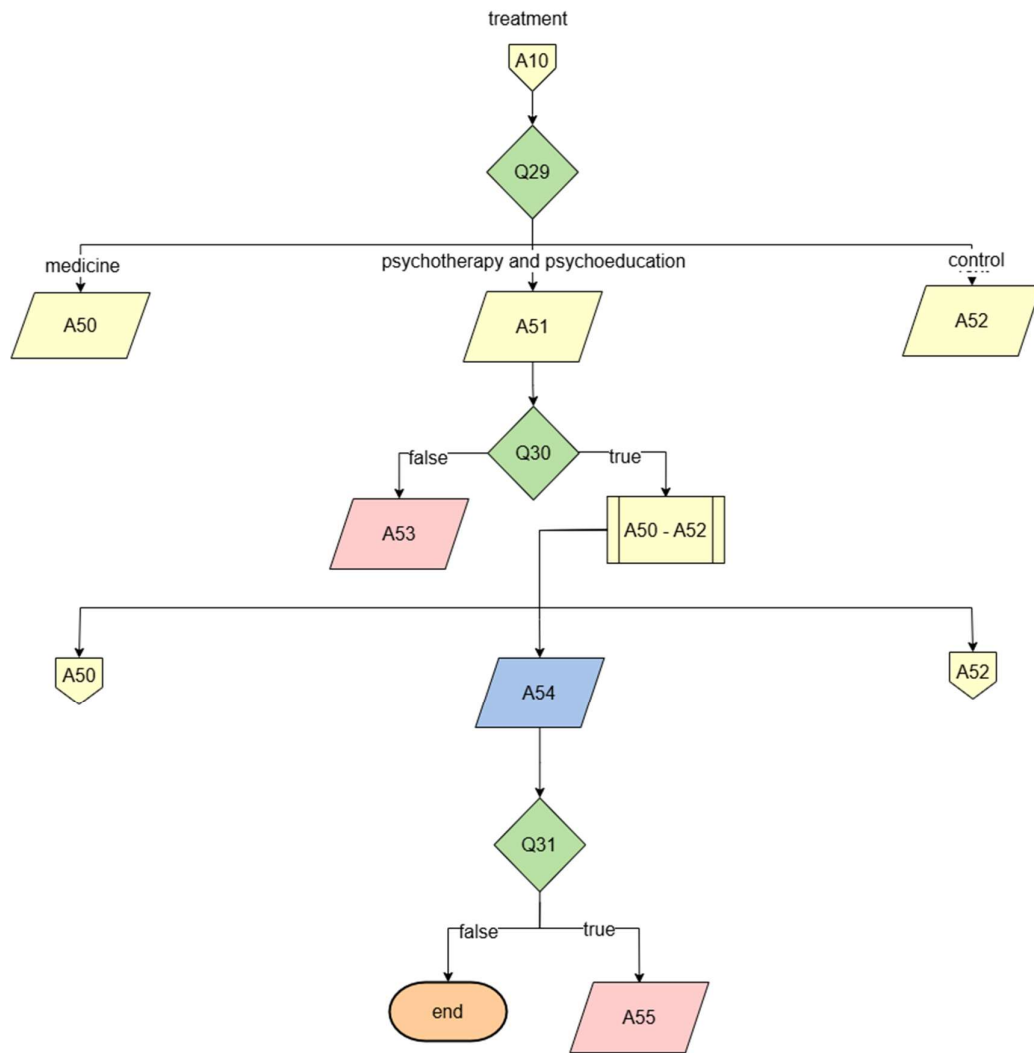

Figure S4. Data Flow Diagram Decision Tree Chatbot - Treatment

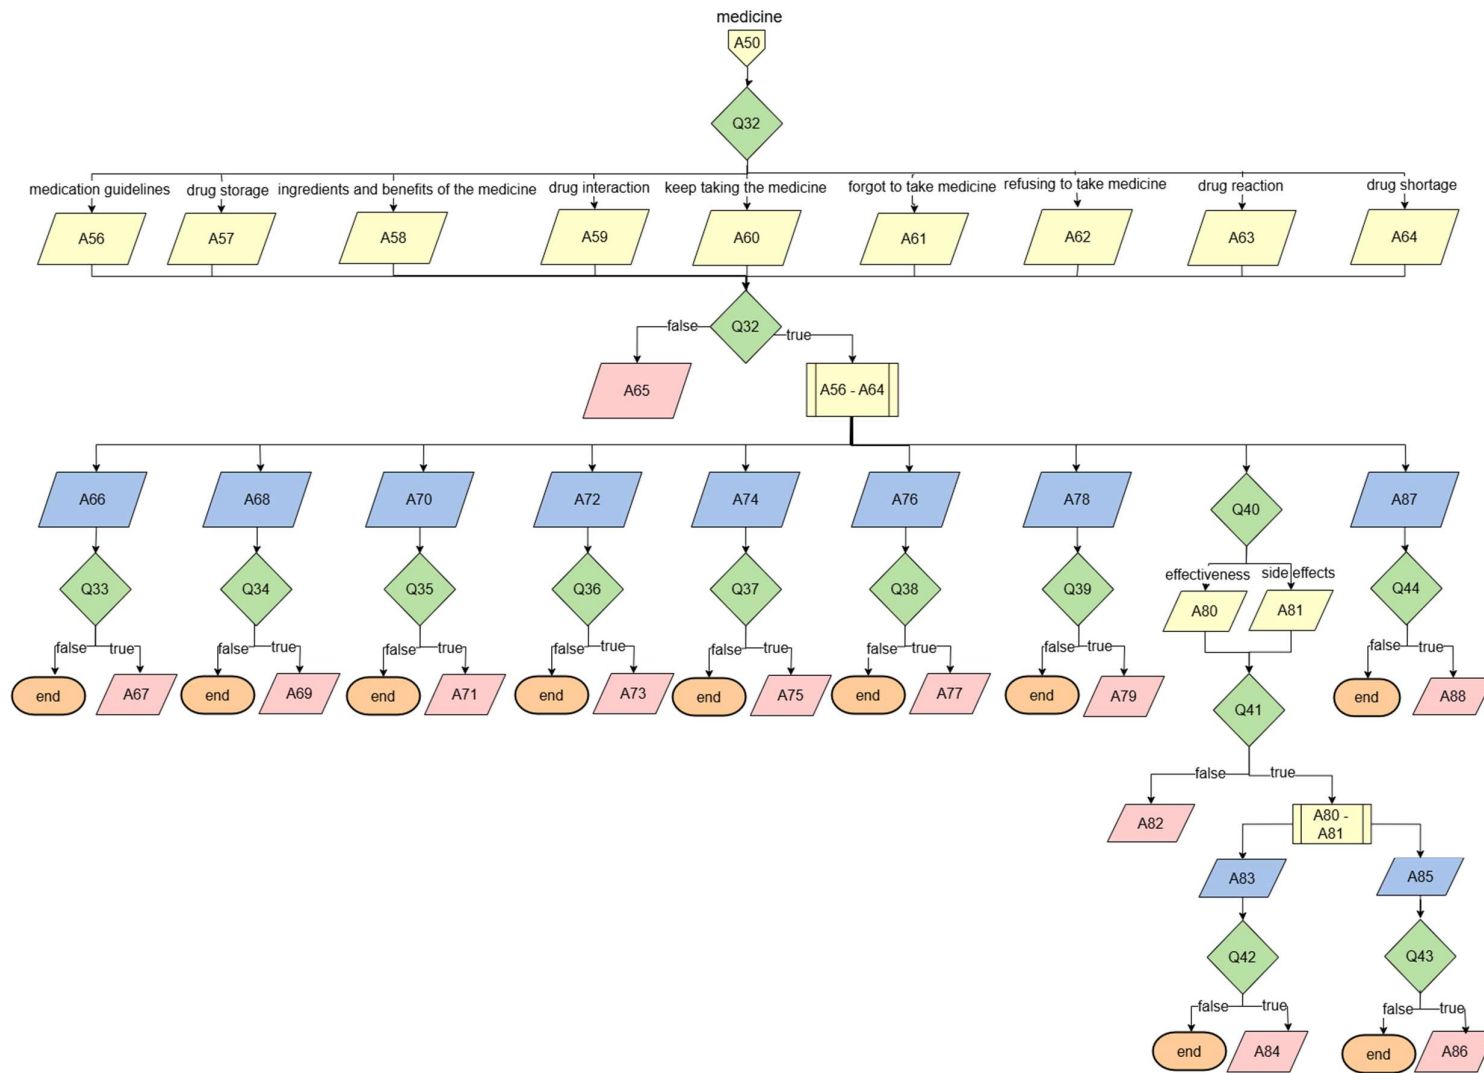

Figure S5. Data Flow Diagram Decision Tree Chatbot – medicine

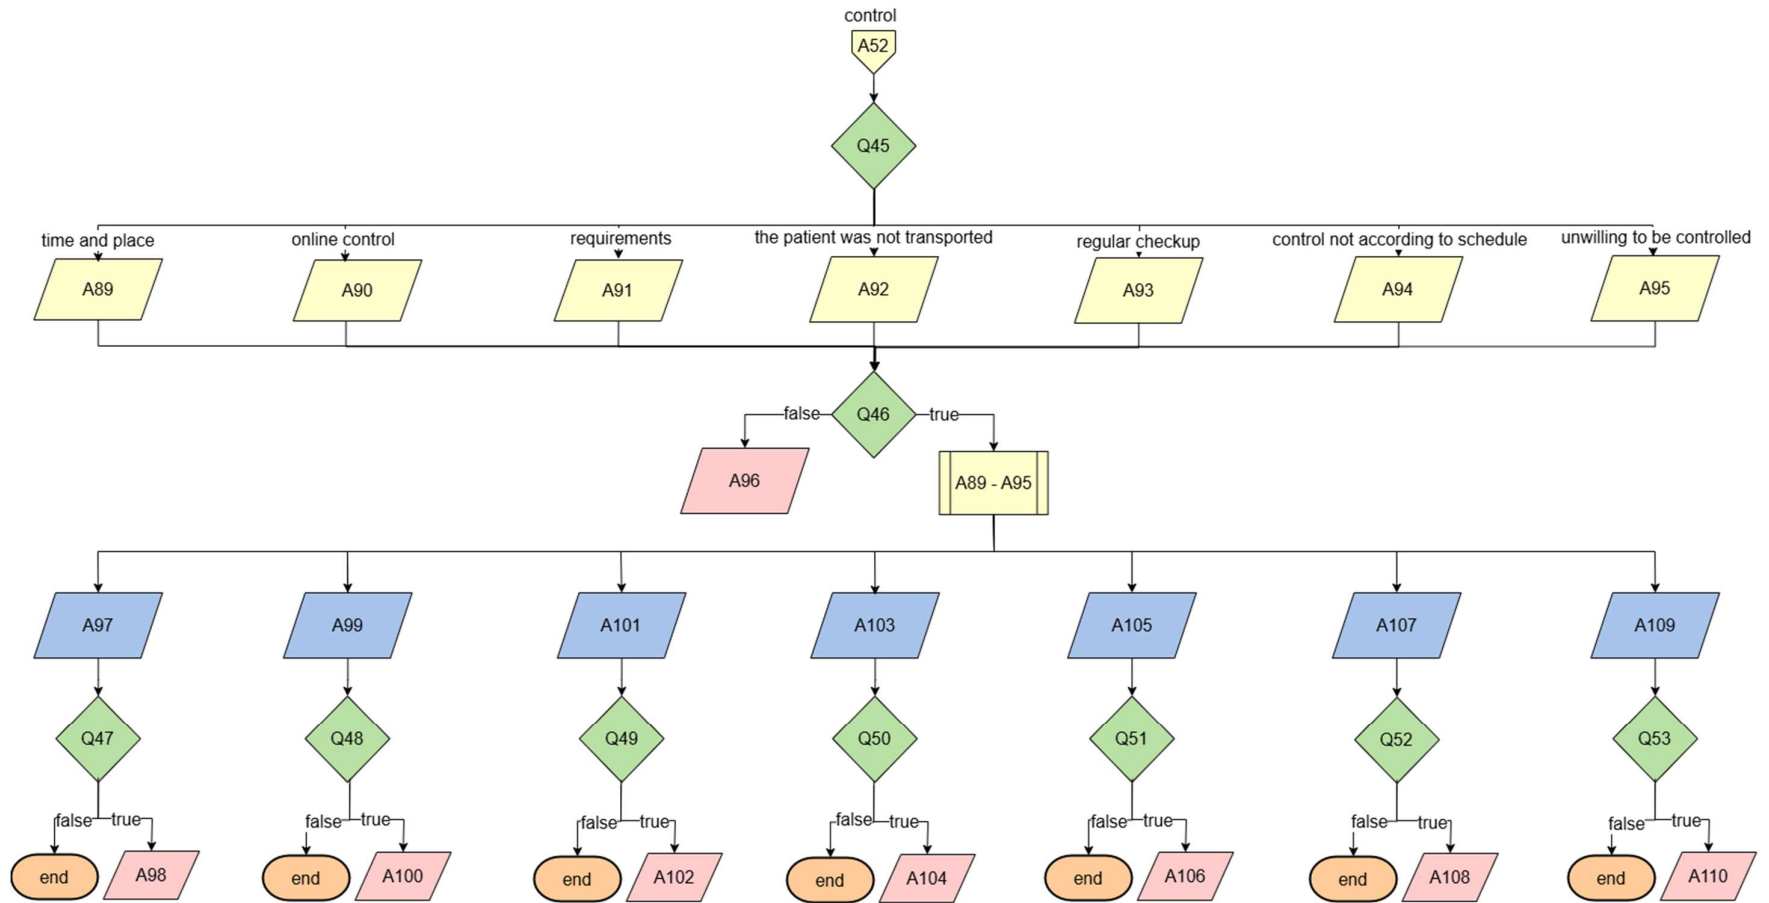

Figure S6. Data Flow Diagram Decision Tree Chatbot - control

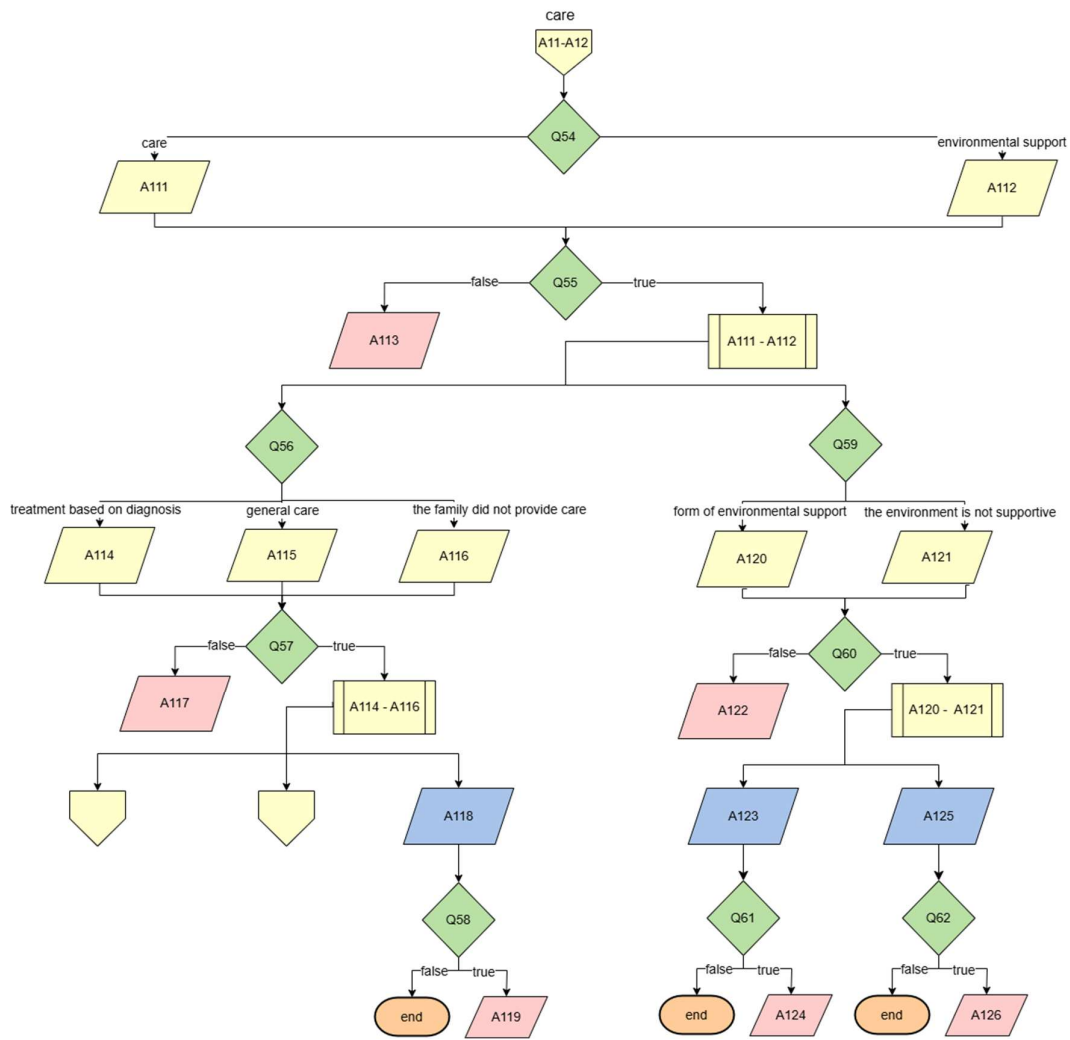

Figure S7. Data Flow Diagram Decision Tree Chatbot – care and environmental support

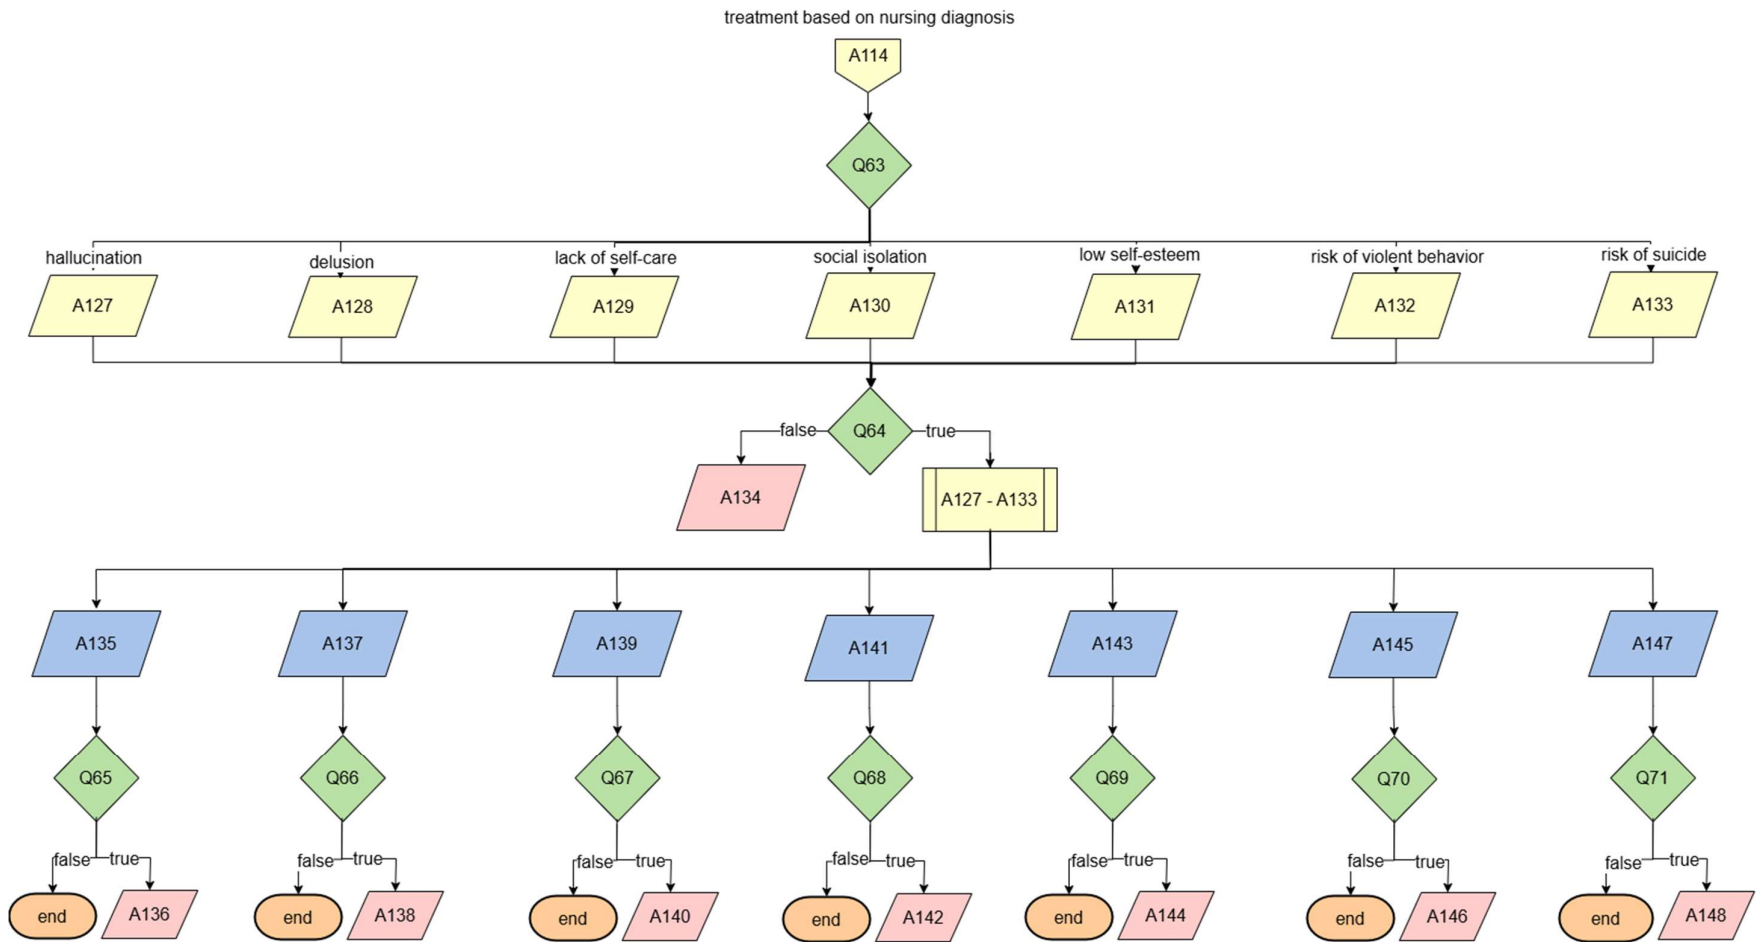

Figure S8. Data Flow Diagram Decision Tree Chatbot – Treatment based on nursing diagnosis

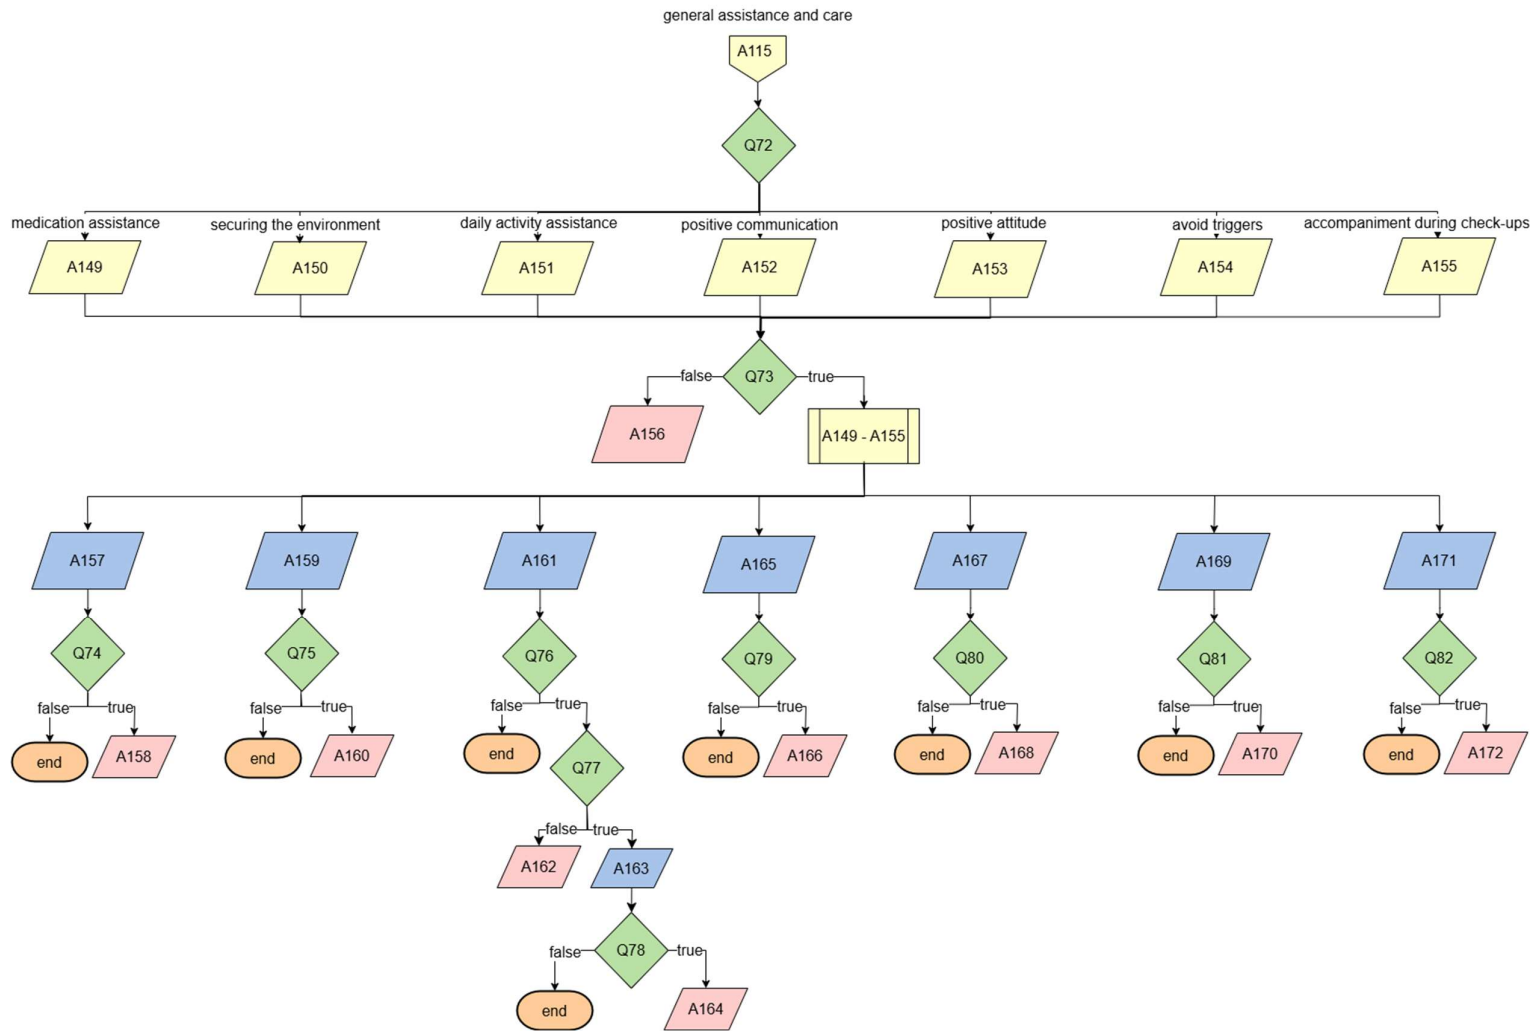

Figure S9. Data Flow Diagram Decision Tree Chatbot – General assistance and care

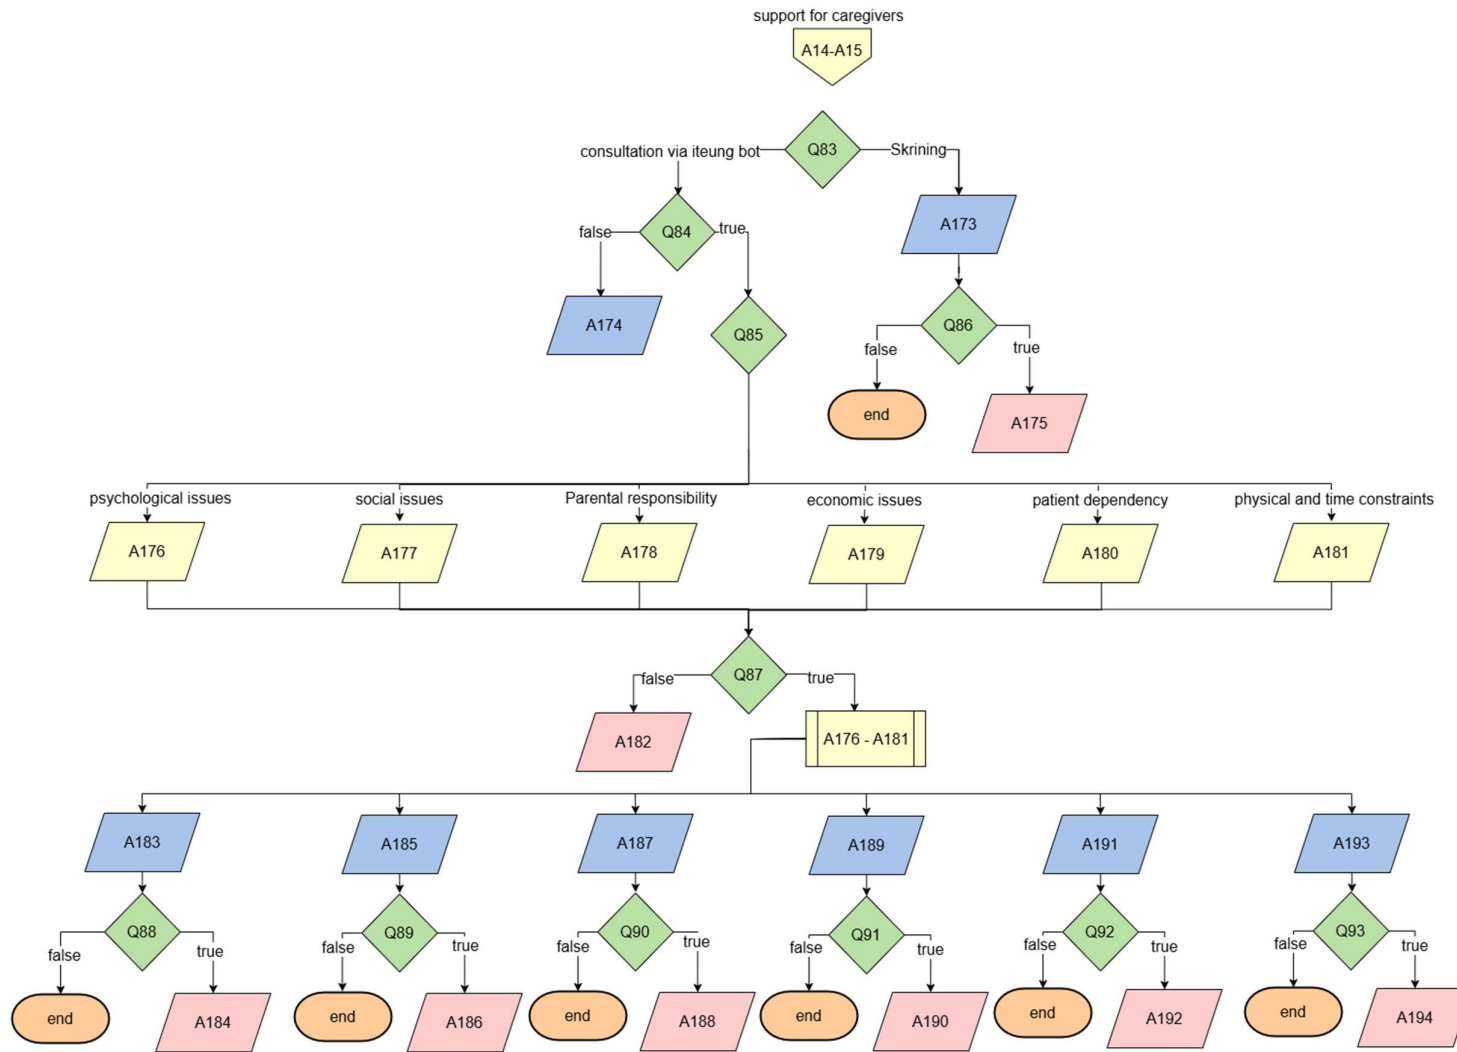

Figure S10. Data Flow Diagram Decision Tree Chatbot – support for caregiver

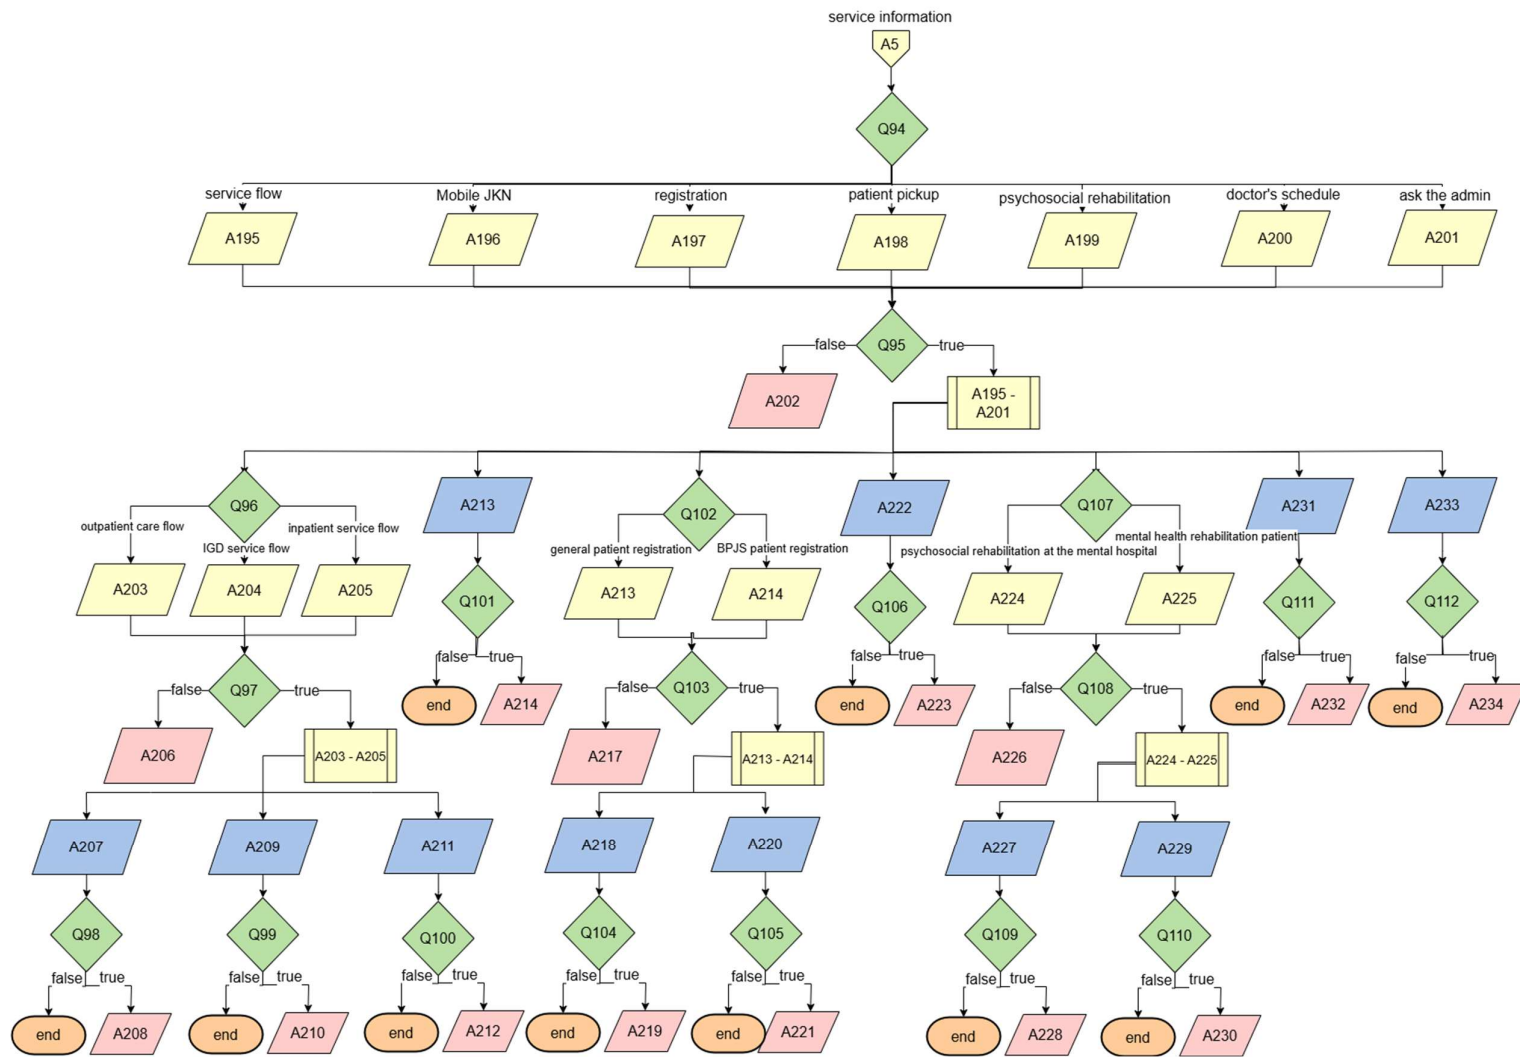

Figure S11. Data Flow Diagram Decision Tree Chatbot – service information

**Supplementary Table 1. Description of Question Codes**

| Code | Description                                                             |
|------|-------------------------------------------------------------------------|
| Q1   | Are you a patient or a caregiver of a patient after hospital discharge? |
| Q2   | What type of consultation do you need?                                  |
| Q3   | Would you like to continue?                                             |
| Q4   | Please choose: patient illness or patient condition monitoring.         |
| Q5   | Would you like to continue?                                             |
| Q6   | Please select the information you would like to know.                   |
| Q7   | Would you like to continue?                                             |
| Q8   | Please choose whether you want to perform screening or consultation.    |
| Q9   | Would you like to continue?                                             |
| Q10  | Please select which service information you would like to know.         |
| Q11  | Please choose what you would like to know.                              |
| Q12  | Would you like to continue?                                             |
| Q13  | Is there anything else you would like to know?                          |
| Q14  | Is there anything else you would like to know?                          |
| Q15  | Is there anything else you would like to know?                          |
| Q16  | Is there anything else you would like to know?                          |
| Q17  | Would you like to know the signs of relapse?                            |
| Q18  | Is there anything else you would like to know?                          |
| Q19  | Would you like to know about early relapse prevention interventions?    |
| Q20  | Is there anything else you would like to know?                          |
| Q21  | Would you like to continue?                                             |
| Q22  | Is there anything else you would like to know?                          |
| Q23  | Please select the information you would like to know.                   |
| Q24  | Would you like to know the signs of relapse?                            |
| Q25  | Would you like to know the signs of relapse?                            |
| Q26  | Is there anything else you would like to know?                          |
| Q27  | Is there anything else you would like to know?                          |
| Q28  | Is there anything else you would like to know?                          |
| Q29  | Please select the information you would like to know.                   |
| Q30  | Would you like to continue?                                             |
| Q31  | Is there anything else you would like to know?                          |
| Q32  | Would you like to continue?                                             |
| Q33  | Is there anything else you would like to know?                          |
| Q34  | Is there anything else you would like to know?                          |
| Q35  | Is there anything else you would like to know?                          |
| Q36  | Is there anything else you would like to know?                          |
| Q37  | Is there anything else you would like to know?                          |
| Q38  | Is there anything else you would like to know?                          |
| Q39  | Is there anything else you would like to know?                          |
| Q40  | What would you like to know about medication reactions?                 |
| Q41  | Would you like to continue?                                             |
| Q42  | Is there anything else you would like to know?                          |
| Q43  | Is there anything else you would like to know?                          |

|     |                                                                                           |
|-----|-------------------------------------------------------------------------------------------|
| Q44 | Is there anything else you would like to know?                                            |
| Q45 | Please select the information you would like to know.                                     |
| Q46 | Would you like to continue?                                                               |
| Q47 | Is there anything else you would like to know?                                            |
| Q48 | Is there anything else you would like to know?                                            |
| Q49 | Is there anything else you would like to know?                                            |
| Q50 | Is there anything else you would like to know?                                            |
| Q51 | Is there anything else you would like to know?                                            |
| Q52 | Is there anything else you would like to know?                                            |
| Q53 | Is there anything else you would like to know?                                            |
| Q54 | Please select the information you would like to know.                                     |
| Q55 | Would you like to continue?                                                               |
| Q56 | Please select the information you would like to know.                                     |
| Q57 | Would you like to continue?                                                               |
| Q58 | Is there anything else you would like to know?                                            |
| Q59 | Please select the information you would like to know.                                     |
| Q60 | Would you like to continue?                                                               |
| Q61 | Is there anything else you would like to know?                                            |
| Q62 | Is there anything else you would like to know?                                            |
| Q63 | Please select the information you would like to know.                                     |
| Q64 | Would you like to continue?                                                               |
| Q65 | Is there anything else you would like to know?                                            |
| Q66 | Is there anything else you would like to know?                                            |
| Q67 | Is there anything else you would like to know?                                            |
| Q68 | Is there anything else you would like to know?                                            |
| Q69 | Is there anything else you would like to know?                                            |
| Q70 | Is there anything else you would like to know?                                            |
| Q71 | Is there anything else you would like to know?                                            |
| Q72 | Please select the information you would like to know.                                     |
| Q73 | Would you like to continue?                                                               |
| Q74 | Is there anything else you would like to know?                                            |
| Q75 | Is there anything else you would like to know?                                            |
| Q76 | Is there anything else you would like to know?                                            |
| Q77 | Would you like to know activities that support patient independence?                      |
| Q78 | Would you like to continue?                                                               |
| Q79 | Is there anything else you would like to know?                                            |
| Q80 | Is there anything else you would like to know?                                            |
| Q81 | Is there anything else you would like to know?                                            |
| Q82 | Is there anything else you would like to know?                                            |
| Q83 | Please select whether you would like to perform screening or consultation.                |
| Q84 | Please choose whether you would like to consult with Iteung Bot or a health professional. |
| Q85 | Would you like to continue the consultation?                                              |
| Q86 | Is there anything else you would like to know?                                            |
| Q87 | Would you like to continue?                                                               |
| Q88 | Is there anything else you would like to know?                                            |

|      |                                                       |
|------|-------------------------------------------------------|
| Q89  | Is there anything else you would like to know?        |
| Q90  | Is there anything else you would like to know?        |
| Q91  | Is there anything else you would like to know?        |
| Q92  | Is there anything else you would like to know?        |
| Q93  | Is there anything else you would like to know?        |
| Q94  | Please select the information you would like to know. |
| Q95  | Would you like to continue?                           |
| Q96  | Please select the information you would like to know. |
| Q97  | Would you like to continue?                           |
| Q98  | Is there anything else you would like to know?        |
| Q99  | Is there anything else you would like to know?        |
| Q100 | Is there anything else you would like to know?        |
| Q101 | Is there anything else you would like to know?        |
| Q102 | Please select the information you would like to know. |
| Q103 | Would you like to continue?                           |
| Q104 | Is there anything else you would like to know?        |
| Q105 | Is there anything else you would like to know?        |
| Q106 | Is there anything else you would like to know?        |
| Q107 | Please select the information you would like to know. |
| Q108 | Would you like to continue?                           |
| Q109 | Is there anything else you would like to know?        |
| Q110 | Is there anything else you would like to know?        |
| Q111 | Is there anything else you would like to know?        |
| Q112 | Is there anything else you would like to know?        |

**Supplementary Table 2. Description of Chatbot Response Codes**

| Code | Description                                                      |
|------|------------------------------------------------------------------|
| A1   | Contact WhatsApp administrator: +62 812-2129-2020 (working days) |
| A2   | Patient condition                                                |
| A3   | Patient recovery support                                         |
| A4   | Caregiver support                                                |
| A5   | Service information                                              |
| A6   | Return to the previous menu                                      |
| A7   | Disease information                                              |
| A8   | Patient condition monitoring                                     |
| A9   | Return to the previous menu                                      |
| A10  | Medication management                                            |
| A11  | Patient care                                                     |
| A12  | Environmental or community support                               |
| A13  | Return to the previous menu                                      |
| A14  | Mental health screening                                          |
| A15  | Consultation                                                     |
| A16  | Return to the previous menu                                      |
| A17  | How can my family and I accept the illness we are facing?        |

|     |                                                                                                                                                                                                                                                                                                                                            |
|-----|--------------------------------------------------------------------------------------------------------------------------------------------------------------------------------------------------------------------------------------------------------------------------------------------------------------------------------------------|
| A18 | Myths about mental illness                                                                                                                                                                                                                                                                                                                 |
| A19 | Mental illness diagnosis                                                                                                                                                                                                                                                                                                                   |
| A20 | Can mental illness be cured?                                                                                                                                                                                                                                                                                                               |
| A21 | Causes of relapse                                                                                                                                                                                                                                                                                                                          |
| A22 | Signs and symptoms of relapse                                                                                                                                                                                                                                                                                                              |
| A23 | Return to the previous menu                                                                                                                                                                                                                                                                                                                |
| A24 | Acceptance of illness takes time and each person experiences it differently. It is normal to need time to adapt. Further information about illness acceptance is available through the provided educational link. Consultation with a psychologist at West Java Provincial Mental Hospital is recommended if additional support is needed. |
| A25 | Return to the previous menu                                                                                                                                                                                                                                                                                                                |
| A26 | Mental disorders may be caused by multiple factors such as brain chemistry imbalance, family history, traumatic experiences, or severe life stress. Treatment is evidence-based and involves consultation with professionals such as psychiatrists or psychologists along with family support.                                             |
| A27 | Return to the previous menu                                                                                                                                                                                                                                                                                                                |
| A28 | Information about mental illness diagnosis is available through the educational link provided.                                                                                                                                                                                                                                             |
| A29 | Return to the previous menu                                                                                                                                                                                                                                                                                                                |
| A30 | Recovery from mental illness varies depending on the severity of the condition and the support available. With appropriate management, individuals can live productive lives. Key recovery factors include medication adherence, family support, therapy, and regular activities.                                                          |
| A31 | Return to the previous menu                                                                                                                                                                                                                                                                                                                |
| A32 | Mental illness relapse may occur due to biological, psychological, or social factors such as medication non-adherence, stress, lack of family support, or irregular medical follow-up. Caregivers are encouraged to maintain medication adherence and regular consultation with healthcare professionals.                                  |
| A33 | Return to the previous menu                                                                                                                                                                                                                                                                                                                |
| A34 | Common relapse signs include sleep disturbances, emotional changes, disorganized thinking, unusual behavior, perceptual disturbances such as hallucinations, medication non-adherence, and physical or behavioral changes.                                                                                                                 |
| A35 | Early intervention strategies for relapse prevention                                                                                                                                                                                                                                                                                       |
| A36 | Return to the previous menu                                                                                                                                                                                                                                                                                                                |
| A37 | Return to the previous menu                                                                                                                                                                                                                                                                                                                |
| A38 | Relapse may occur gradually or suddenly. Families can perform early interventions such as communicating calmly, ensuring medication adherence, reducing stress, encouraging positive activities, monitoring symptoms, and consulting healthcare professionals if necessary.                                                                |
| A39 | Return to the previous menu                                                                                                                                                                                                                                                                                                                |
| A40 | Return to the previous menu                                                                                                                                                                                                                                                                                                                |
| A41 | Comorbid physical illness after discharge                                                                                                                                                                                                                                                                                                  |

|     |                                                                                                                                                                                                                                                    |
|-----|----------------------------------------------------------------------------------------------------------------------------------------------------------------------------------------------------------------------------------------------------|
| A42 | What should be done if the patient's condition does not improve or becomes more agitated after discharge?                                                                                                                                          |
| A43 | Return to the previous menu                                                                                                                                                                                                                        |
| A44 | Families can monitor patient conditions at home by observing behavior changes, ensuring medication adherence, and contacting healthcare providers if professional monitoring is required.                                                          |
| A45 | Return to the previous menu                                                                                                                                                                                                                        |
| A46 | If additional medical conditions appear after discharge, visit the nearest health facility for further examination.                                                                                                                                |
| A47 | Return to the previous menu                                                                                                                                                                                                                        |
| A48 | Mental health recovery often occurs gradually. Families should ensure medication adherence, attend scheduled follow-ups, and seek emergency care if the patient becomes dangerous to themselves or others.                                         |
| A49 | Return to the previous menu                                                                                                                                                                                                                        |
| A50 | Medication information                                                                                                                                                                                                                             |
| A51 | Psychotherapy and psychoeducation                                                                                                                                                                                                                  |
| A52 | Follow-up consultation                                                                                                                                                                                                                             |
| A53 | Return to the previous menu                                                                                                                                                                                                                        |
| A54 | Contact WhatsApp service: +62 812-2129-2020                                                                                                                                                                                                        |
| A55 | Return to the previous menu                                                                                                                                                                                                                        |
| A56 | Medication dosage rules: can patients change the dosage themselves?                                                                                                                                                                                |
| A57 | Proper medication storage                                                                                                                                                                                                                          |
| A58 | Medication composition and benefits                                                                                                                                                                                                                |
| A59 | Drug interactions                                                                                                                                                                                                                                  |
| A60 | Why must medication be taken continuously?                                                                                                                                                                                                         |
| A61 | What should be done if medication is forgotten?                                                                                                                                                                                                    |
| A62 | What if the patient refuses to take medication?                                                                                                                                                                                                    |
| A63 | Medication reactions                                                                                                                                                                                                                               |
| A64 | What should be done if medication from the hospital is insufficient?                                                                                                                                                                               |
| A65 | Return to the previous menu                                                                                                                                                                                                                        |
| A66 | Psychiatric medications must be taken consistently according to the physician's prescription to maintain stable therapeutic levels. Adjusting dosage or stopping medication without medical supervision may cause relapse or serious side effects. |
| A67 | Return to the previous menu                                                                                                                                                                                                                        |
| A68 | Proper medication storage guidelines include keeping medicines in a cool dry place, away from sunlight and humidity, stored in original packaging, and checking expiration dates regularly.                                                        |
| A69 | Return to the previous menu                                                                                                                                                                                                                        |
| A70 | Psychiatric medications have different functions depending on the condition treated, including stabilizing mood, reducing anxiety, or controlling psychotic symptoms.                                                                              |
| A71 | Return to the previous menu                                                                                                                                                                                                                        |
| A72 | For information about interactions between psychiatric medication and other drugs or food, contact the KJOL service.                                                                                                                               |
| A73 | Return to the previous menu                                                                                                                                                                                                                        |

|      |                                                                                                                                                                                                              |
|------|--------------------------------------------------------------------------------------------------------------------------------------------------------------------------------------------------------------|
| A74  | Many mental illnesses are chronic conditions; medication helps maintain stability and prevent relapse.                                                                                                       |
| A75  | Return to the previous menu                                                                                                                                                                                  |
| A76  | If a dose is missed and it is still early, take the medication immediately. If it is close to the next scheduled dose, skip the missed dose and continue normally.                                           |
| A77  | Return to the previous menu                                                                                                                                                                                  |
| A78  | Tips for encouraging patients to take medication include open discussion, explaining the purpose of medication, maintaining routines, monitoring symptoms, and consulting professionals if refusal persists. |
| A79  | Return to the previous menu                                                                                                                                                                                  |
| A80  | Medication effectiveness                                                                                                                                                                                     |
| A81  | Medication side effects                                                                                                                                                                                      |
| A82  | Return to the previous menu                                                                                                                                                                                  |
| A83  | Psychiatric medication helps reduce symptoms but may affect individuals differently. Medication adherence and regular consultation are important.                                                            |
| A84  | Return to the previous menu                                                                                                                                                                                  |
| A85  | Signs of antipsychotic side effects are available through the educational link provided.                                                                                                                     |
| A86  | Return to the previous menu                                                                                                                                                                                  |
| A87  | Contact the administrator via WhatsApp for further assistance.                                                                                                                                               |
| A88  | Return to the previous menu                                                                                                                                                                                  |
| A89  | When should the next medical follow-up occur?                                                                                                                                                                |
| A90  | Is online consultation available?                                                                                                                                                                            |
| A91  | Administrative requirements for post-discharge follow-up                                                                                                                                                     |
| A92  | Can follow-up occur without bringing the patient?                                                                                                                                                            |
| A93  | Why is routine follow-up important?                                                                                                                                                                          |
| A94  | Can follow-up occur outside the scheduled time?                                                                                                                                                              |
| A95  | What should be done if the patient refuses follow-up consultation?                                                                                                                                           |
| A96  | Return to the previous menu                                                                                                                                                                                  |
| A97  | Follow-up schedule: first follow-up 14 days after discharge, routine follow-up every 1–2 months depending on physician recommendations.                                                                      |
| A98  | Return to the previous menu                                                                                                                                                                                  |
| A99  | Online follow-up consultation is currently not available.                                                                                                                                                    |
| A100 | Return to the previous menu                                                                                                                                                                                  |
| A101 | Follow-up requirements include discharge summary, follow-up plan letter, identification card, and health insurance card if applicable.                                                                       |
| A102 | Return to the previous menu                                                                                                                                                                                  |
| A103 | Patients should attend follow-up consultations because psychiatrists need to assess their condition directly.                                                                                                |
| A104 | Return to the previous menu                                                                                                                                                                                  |
| A105 | Routine follow-up ensures patient stability, medication evaluation, relapse detection, psychosocial support, and treatment adherence.                                                                        |
| A106 | Return to the previous menu                                                                                                                                                                                  |
| A107 | Follow-up should ideally occur according to the scheduled date recommended by the physician.                                                                                                                 |

|               |                                                                                                                                                |
|---------------|------------------------------------------------------------------------------------------------------------------------------------------------|
| A108          | Return to the previous menu                                                                                                                    |
| A109          | If the patient refuses follow-up consultation, families should communicate calmly and seek assistance from healthcare professionals.           |
| A110          | Return to the previous menu                                                                                                                    |
| A111          | Home care                                                                                                                                      |
| A112          | Environmental and community support                                                                                                            |
| A113          | Return to the previous menu                                                                                                                    |
| A114          | Patient care based on diagnosis                                                                                                                |
| A115          | General patient care and support                                                                                                               |
| A116          | What if the family cannot fully provide caregiving support?                                                                                    |
| A117          | Return to the previous menu                                                                                                                    |
| A118          | If family support is limited, options include psychosocial rehabilitation programs, community health services, or social support institutions. |
| A119          | Return to the previous menu                                                                                                                    |
| A120          | Forms of environmental support                                                                                                                 |
| A121          | What if the environment is not supportive?                                                                                                     |
| A122          | Return to the previous menu                                                                                                                    |
| A123          | Community support includes reducing stigma, encouraging social participation, and providing a safe environment.                                |
| A124          | Return to the previous menu                                                                                                                    |
| A125          | If the environment is not supportive, families may seek assistance from local health centers or community health workers.                      |
| A126          | Return to the previous menu                                                                                                                    |
| A127          | Patients with hallucinations                                                                                                                   |
| A128          | Patients with delusions                                                                                                                        |
| A129          | Patients with self-care deficits                                                                                                               |
| A130          | Patients with social isolation                                                                                                                 |
| A131          | Patients with low self-esteem                                                                                                                  |
| A132          | Patients with risk of violent behavior                                                                                                         |
| A133          | Patients with suicide risk                                                                                                                     |
| A134          | Return to the previous menu                                                                                                                    |
| A135–<br>A147 | Educational resource links for diagnosis-based patient care                                                                                    |
| A148          | Return to the previous menu                                                                                                                    |
| A149          | Medication supervision                                                                                                                         |
| A150          | Ensuring a safe home environment                                                                                                               |
| A151          | Daily activity assistance                                                                                                                      |
| A152          | Positive communication                                                                                                                         |
| A153          | Positive attitudes that support recovery                                                                                                       |
| A154          | Avoid relapse triggers and conflicts                                                                                                           |
| A155          | Support during follow-up consultations                                                                                                         |
| A156          | Return to the previous menu                                                                                                                    |
| A157–<br>A171 | Practical guidance for caregiving activities including medication supervision, daily routines, communication, and patient support              |
| A172          | Return to the previous menu                                                                                                                    |
| A173          | Mental health screening link                                                                                                                   |

|               |                                                                                                                         |
|---------------|-------------------------------------------------------------------------------------------------------------------------|
| A174          | Consultation service link                                                                                               |
| A175          | Return to the previous menu                                                                                             |
| A176–<br>A181 | Strategies to address caregiver emotional, social, caregiving responsibility, economic, dependency, and time challenges |
| A182          | Return to the previous menu                                                                                             |
| A183–<br>A193 | Guidance for caregiver psychological support, social support, caregiving burden management, and coping strategies       |
| A194          | Return to the previous menu                                                                                             |
| A195          | Service flow                                                                                                            |
| A196          | Mobile JKN information                                                                                                  |
| A197          | Registration                                                                                                            |
| A198          | Patient transportation service                                                                                          |
| A199          | Psychosocial rehabilitation                                                                                             |
| A200          | Doctor schedule                                                                                                         |
| A201          | Contact administrator                                                                                                   |
| A202          | Return to the previous menu                                                                                             |
| A203          | Outpatient follow-up flow                                                                                               |
| A204          | Emergency department admission flow                                                                                     |
| A205          | Inpatient admission flow                                                                                                |
| A206          | Return to the previous menu                                                                                             |
| A207–<br>A212 | Educational service information links                                                                                   |
| A213          | Mobile JKN information link                                                                                             |
| A214          | Return to the previous menu                                                                                             |
| A215          | Registration for general patients                                                                                       |
| A216          | Registration for insured patients (BPJS)                                                                                |
| A217          | Return to the previous menu                                                                                             |
| A218–<br>A223 | Registration information links                                                                                          |
| A224          | Psychosocial rehabilitation at RSJ (Daycare/Nightcare)                                                                  |
| A225          | Mental rehabilitation center                                                                                            |
| A226          | Return to the previous menu                                                                                             |
| A227–<br>A229 | Psychosocial rehabilitation institution information                                                                     |
| A230          | Return to the previous menu                                                                                             |
| A231          | Hospital social media information                                                                                       |
| A232          | Return to the previous menu                                                                                             |
| A233          | WhatsApp consultation link                                                                                              |
| A234          | Return to the previous menu                                                                                             |
